# Supplementary material for: Normal myeloid progenitor cell subset-associated gene signatures for acute myeloid leukaemia subtyping with prognostic impact
Source: PubMed Central journal article supplement (PMC7179860; doi:10.1371/journal.pone.0229593), 2020-04-23

**Supplemental Figure S3:** GSEA enrichment plots for **A)** the HSC low cell-cycle activity profile; **B)** the GMP high metabolism profile; **C)** the GMP innate immune activation profile; **D)** the MEP high cell-cycle activity profile; and **E)** the MEP impaired innate immune activity profile. Only top ranking significantly enriched gene sets are presented.

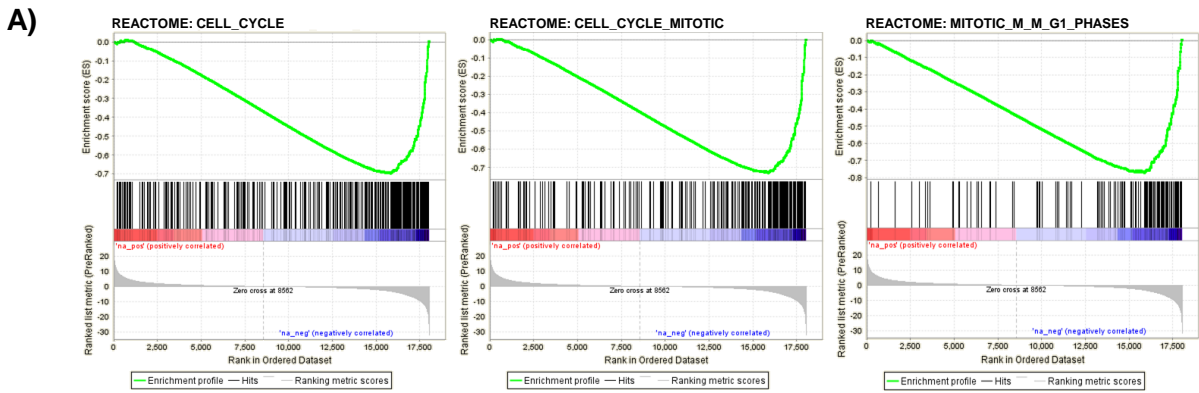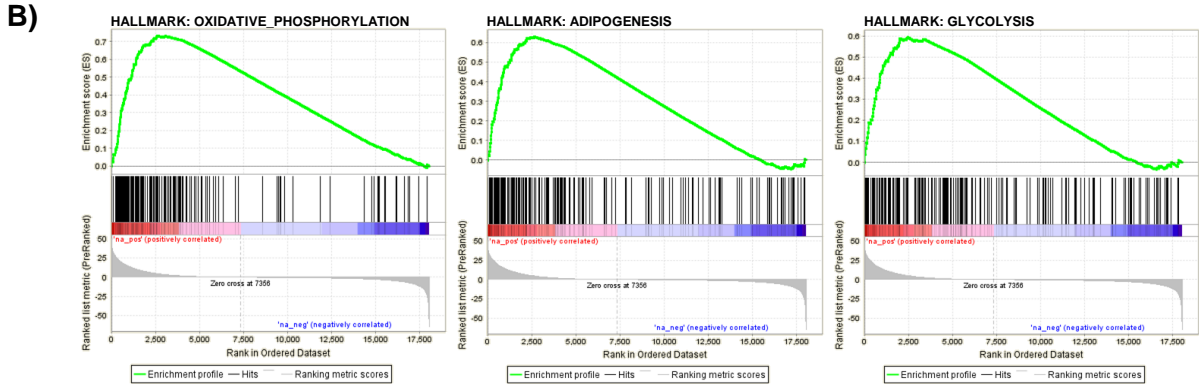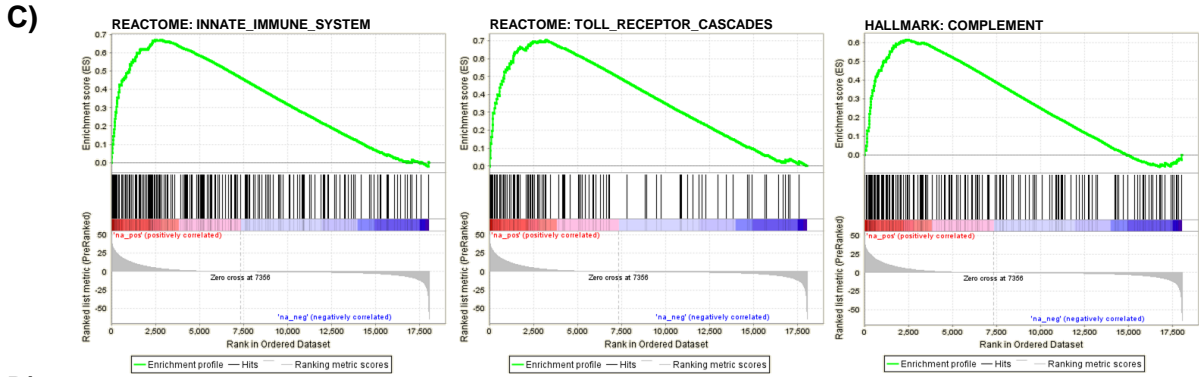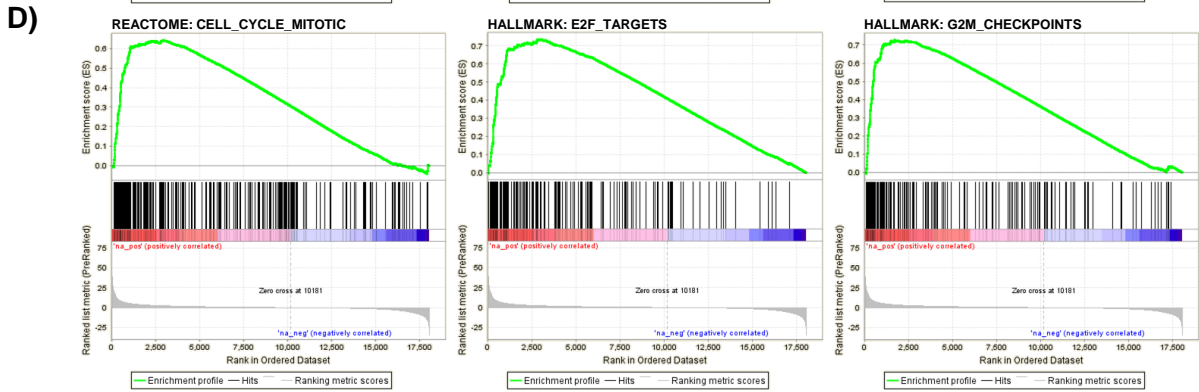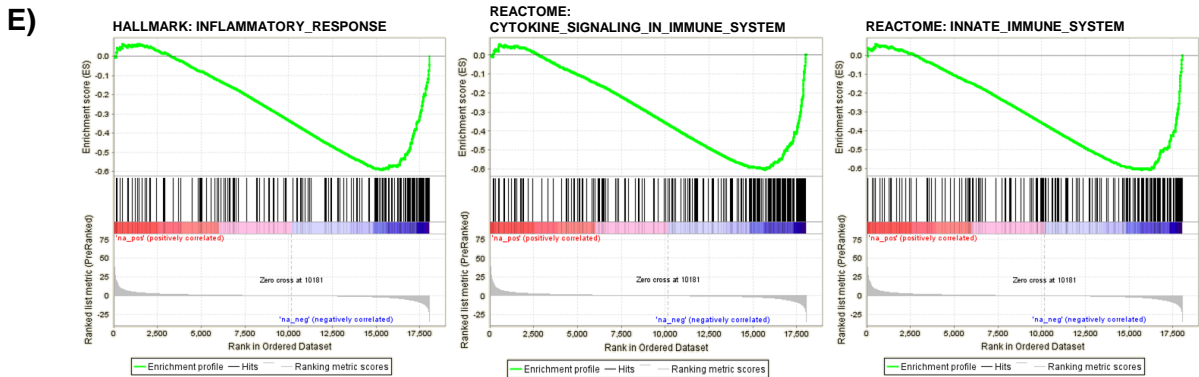

Supplement: pone.0229593.s013.pdf [file pone.0229593.s013.pdf]
